# Supplementary material for: Data Literacy in Genome Research
Source: Preprints.org preprint supplement (doi:10.20944/preprints202309.0079.v1), 2023-09-04
Supplement: Supplementary file 1 [file supplementary]

Additional workflow steps in grey are methods, that would have been necessary for other tools (read trimming for Flye assembler), that could have optimized our results (repeat masking) or further analyses (variant calling and read mapping). Unfortunately, we did not have time to perform them. Alternative tools for certain workflow steps are also indicated in grey.

| Workflow Steps                              | Tools                                                                                                                                                                         | Input                               | Output                                          | Commands for Tools                                                                                                                                                           |
|---------------------------------------------|-------------------------------------------------------------------------------------------------------------------------------------------------------------------------------|-------------------------------------|-------------------------------------------------|------------------------------------------------------------------------------------------------------------------------------------------------------------------------------|
| <b>DNA-Extraction</b>                       | CTAB-based DNA extraction                                                                                                                                                     | Plant material                      | High molecular DNA                              | -                                                                                                                                                                            |
| <b>Library Preparation &amp; Sequencing</b> | Oxford Nanopore Technologies (SQK-LSK109, MinION)                                                                                                                             | High molecular DNA                  | Raw sequencing data in FAST5 format             | -                                                                                                                                                                            |
| <b>Basecalling</b>                          | Guppy, Bonito                                                                                                                                                                 | Raw sequencing data in FAST5 format | Long reads in FASTQ format                      | guppy_basecaller<br>-i /path_to_fast5_directory<br>-s /path_to_output_directory<br>--compress_fastq<br>-x 'cuda:0'<br>--flowcell flow_cell_type<br>--kit sequencing_kit_type |
| <b>Quality Control</b>                      | Customized python script FASTQ_stats3_graphical_v0.2.py by Samuel Nestor Meckoni, <a href="https://codeberg.org/snmeckoni/scripts">https://codeberg.org/snmeckoni/scripts</a> | Long reads in FASTQ format          | Histogram of read length distribution           |                                                                                                                                                                              |
| <b>Read Trimming</b>                        | (read trimming was needed for Flye, but not for Shasta as read trimming is integrated)                                                                                        | Long reads in FASTQ format          | Long reads in FASTQ format, filtered for >10 kb |                                                                                                                                                                              |
| <b>Assembly</b>                             | Shasta, Canu, Flye                                                                                                                                                            | Long reads in FASTQ format          | Contigs in FASTA format                         | shasta-Linux-0.11.1<br>--input /fastq_file<br>--assemblyDirectory /output_directory<br>--config /config_file                                                                 |

|                           |                           |                         |                                                              |                                                                                                                                                                                                                                                                                                      |
|---------------------------|---------------------------|-------------------------|--------------------------------------------------------------|------------------------------------------------------------------------------------------------------------------------------------------------------------------------------------------------------------------------------------------------------------------------------------------------------|
| <b>Quality Control</b>    | BUSCO, stats, QUAST, NLR  | Contigs in FASTA format | Percentage of BUSCOs found                                   | busco<br>--cpu number of cpu<br>--download_path /path_to_busco_database<br>-l /database_for_busco_search<br>-i /path_to_assembly_fasta<br>-o /output_directory<br>-m mode/sequence_type<br>-f (overwriting existing files)<br>>> /path_to_log_file<br>2>&1 & (errors into log file)                  |
| <b>Repeat Masking</b>     | RepeatMasker              |                         |                                                              | RepeatMasker<br>-e hmmer (engine)<br>-pa 5 (no. of processors)<br>-qq (rush job, less sensitive)<br>-species arabidopsis (nearest model sp.)<br>-no_is (no check for bacterial insertions)<br>-dir /output_directory<br>-small (type of masking)<br>/path_to_assembly_fasta<br>> /path_to_log_file & |
| <b>Struct. Annotation</b> | Augustus, GeMoMa, BRAKER3 | Contigs in FASTA format | mRNA, CDS, PEP sequences in FASTA and annotation GFF3 format | augustus<br>--gff3=on<br>--UTR=on<br>--uniqueGenId=true<br>--protein=on<br>--cds=on<br>--species=arabidopsis<br>/path_to_assembly_fasta<br>> /path_to_output_gff3_file<br>2> /path_to_log_file &                                                                                                     |

|                              |                                                     |                                                 |                        |                                                                                                                                                                                                                                                                                                                                                                                                                  |
|------------------------------|-----------------------------------------------------|-------------------------------------------------|------------------------|------------------------------------------------------------------------------------------------------------------------------------------------------------------------------------------------------------------------------------------------------------------------------------------------------------------------------------------------------------------------------------------------------------------|
| <b>Funct.<br/>Annotation</b> | MYB annotator, KIPES,<br>BLAST, InterProScan5, KEGG | Peptide sequences from<br>structural annotation | Candidate<br>sequences | python3 KIPES3.py<br>--baits /path_to_baits_directory<br>--positions /path_to_residuals_directory<br>--out /output_directory<br>--subject /fasta_from_structural_annotation<br>--seqtype type_of_sequence<br><br>python3 MYB_annotator.py<br>--baits /path_to_baits_fasta<br>--info /path_to_baits_txt<br>--out /output_directory<br>--subject /fasta_from_structural_annotation<br>--fasttree /path_to_FastTree |
| <b>Variant Calling</b>       |                                                     |                                                 |                        |                                                                                                                                                                                                                                                                                                                                                                                                                  |
| <b>Read mapping</b>          |                                                     |                                                 |                        |                                                                                                                                                                                                                                                                                                                                                                                                                  |
